# Supplementary material for: Tuning the topology structures of polymolybdate-based hybrids from interpenetrated framework to interdigitated architecture via changing polymolybdate clusters
Source: Royal Society of Chemistry journal article supplement (doi:10.1039/c5nj00238a), 2015-01-01
Supplement: c5nj00238a1.pdf [file c5nj00238a1.pdf]

# Tuning the Topology Structures of Polymolybdate-based Hybrids from Interpenetrated Framework to Interdigitated Architecture *via* Changing Polymolybdate Clusters†

Shaobin Li, Li Zhang, Huiyuan Ma\*, Haijun Pang\* and Chunyan Zhao

*Key Laboratory of Green Chemical Engineering and Technology of College of Heilongjiang Province, College of Chemical and Environmental Engineering, Harbin University of Science and Technology, Harbin 150040, China Tel.: 86-0451-86392716, Fax: 86-0451-86392716; E-mail: mahy017@163.com (Ma H. Y.), panghj116@163.com (Pang. H. J.).*

## Table of contents:

1. **Table S1** All of the H-bonds in **3**.
2. **Fig. S1**. View of the detailed formation process of the 2D layer in **3**.
3. **Fig. S2** The IR spectra of compounds **1-3**.
4. **Fig. S3** Output of a calculated powder X-ray pattern by POWDER CELL for compounds **1-3**.
5. **Fig. S4** The plots of the anodic and the cathodic peak currents for wave I of **1-** (a), **2-** (b) and **3-**CPE (c) against scan rates, respectively.
6. **Fig. S5** Reduction of  $\text{IO}_3^-$  for **1-** (a), **2-** (b) and **3-**CPEs (c) in 1M  $\text{H}_2\text{SO}_4$  solution.
7. **Fig. S6** The linear dependence of the cathodic catalytic current of wave I for **1-** (a), **2-** (b) and **3-**CPE (c), with  $\text{IO}_3^-$  concentration, respectively.
8. **Fig. S7** The 40 consecutive CV cycles of the **1**, **2** and **3**-CPEs at the scan rate of  $50 \text{ mV}\cdot\text{s}^{-1}$ .

**Table S1** All of the H-bonds in **3**.

| D-H...A <sup>a</sup> | D-H  | H...A | D...A | ∠D-H...A |
|----------------------|------|-------|-------|----------|
| C8-H8...O8           | 0.93 | 2.487 | 3.407 | 169.81   |
| C8-H8...O16          | 0.93 | 2.549 | 3.066 | 115.50   |
| C15-H15...O5         | 0.93 | 2.597 | 3.302 | 132.98   |
| C13-H13...O13        | 0.93 | 2.242 | 3.112 | 155.50   |
| C3-H3...O7           | 0.93 | 2.515 | 3.275 | 138.99   |
| C9-H9...O2           | 0.93 | 2.426 | 3.257 | 148.80   |
| C5-H5...O14          | 0.93 | 2.648 | 3.462 | 146.59   |
| C6-H6...O15          | 0.93 | 2.658 | 3.343 | 131.01   |
| C17-H17...O14        | 0.93 | 2.476 | 3.404 | 176.45   |
| C24-H24...O18        | 0.93 | 2.494 | 3.412 | 169.03   |

<sup>a</sup>D = donor atom, A = acceptor atom.

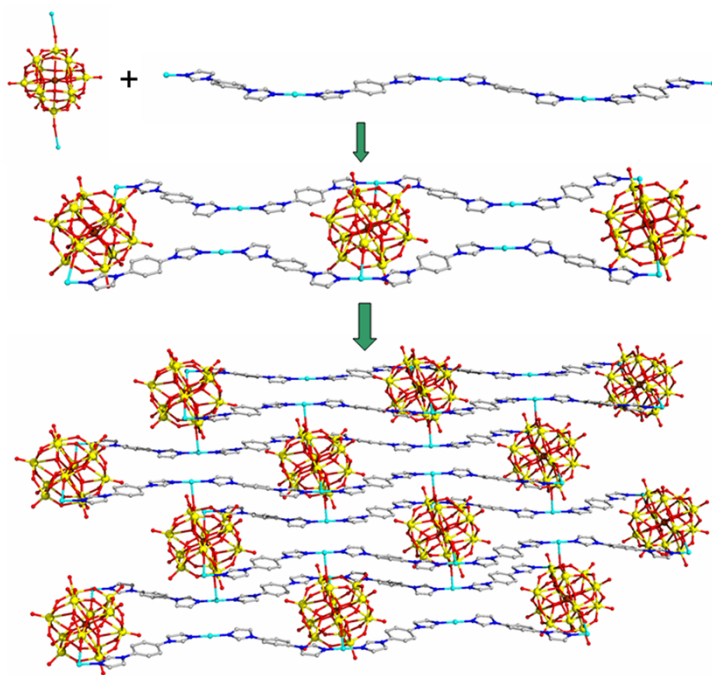

**Fig. S1.** View of the detailed formation process of the 2D layer in **3**.

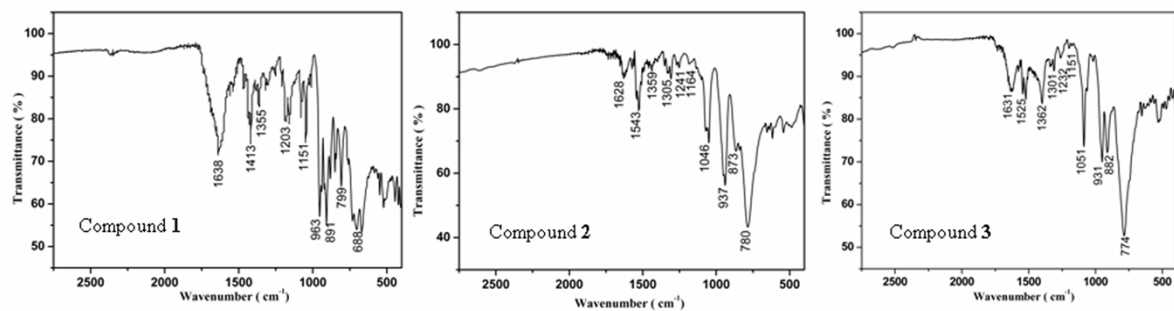

**Fig. S2.** The IR spectra of copounds **1-3**.

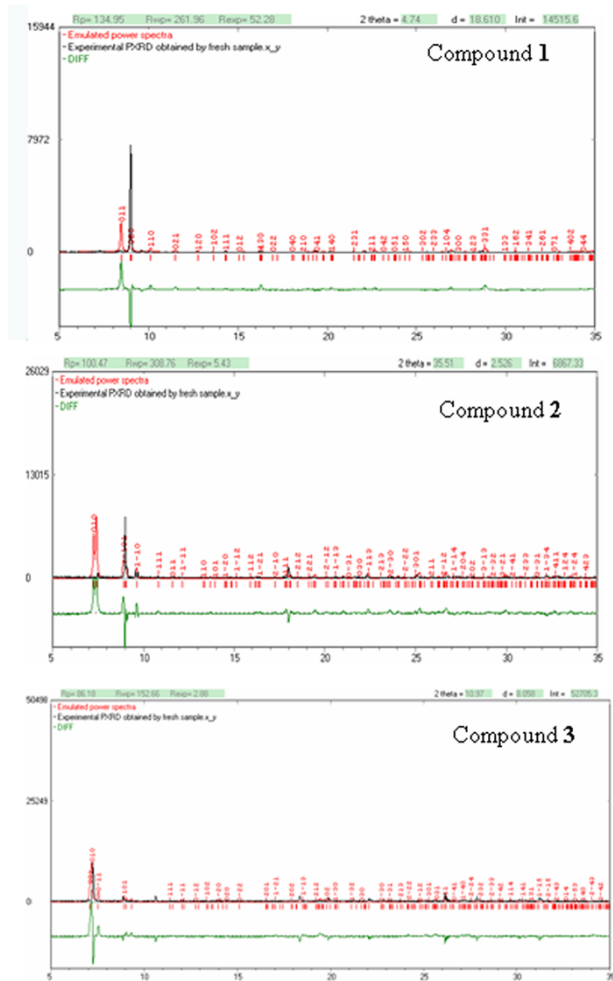

Fig. S3. Output of a calculated powder X-ray pattern by POWDER CELL for compounds 1-3.

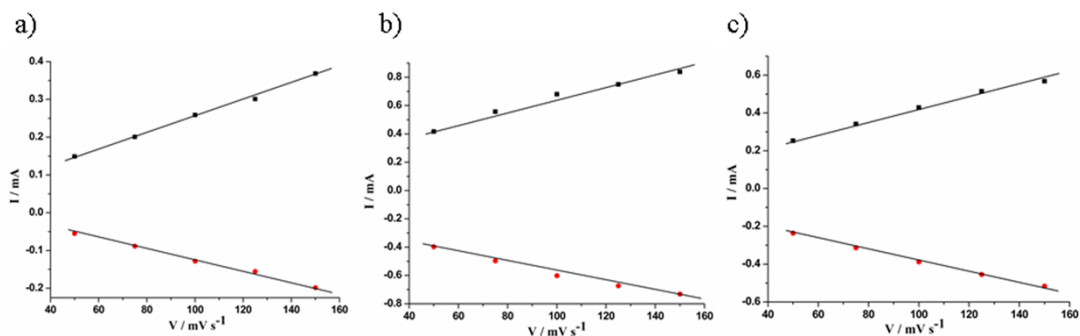

Fig. S4. The plots of the anodic and the cathodic peak currents for wave I of 1- (a), 2- (b) and 3-CPE (c) against scan rates, respectively.

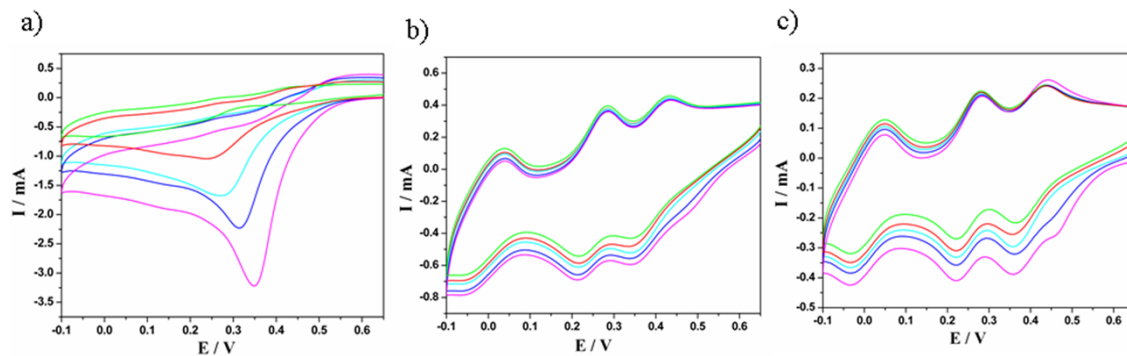

**Fig. S5.** Reduction of  $\text{IO}_3^-$  for **1-** (a), **2-** (b) and **3-CPEs** (c) in 1M  $\text{H}_2\text{SO}_4$  solution (scan rate:  $50 \text{ mV}\cdot\text{s}^{-1}$ ). The concentrations (from inner to outer) are 0, 5, 10, 15, 20 mM for  $\text{IO}_3^-$  respectively.

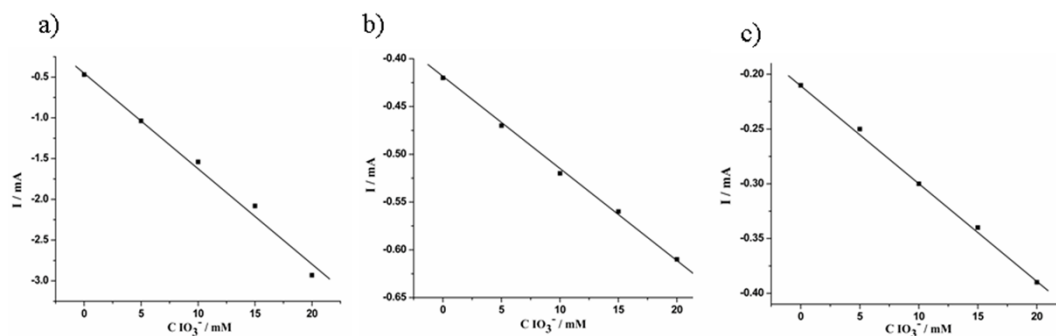

**Fig. S6.** The linear dependence of the cathodic catalytic current of wave I for **1-** (a), **2-** (b) and **3-CPE** (c), with  $\text{IO}_3^-$  concentration, respectively.

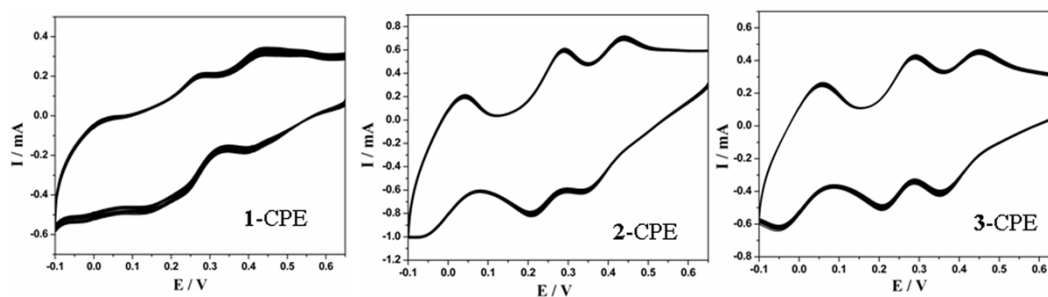

**Fig. S7.** The 40 consecutive CV cycles of the **1-**, **2-** and **3-CPEs** at the scan rate of  $50 \text{ mV}\cdot\text{s}^{-1}$ .
